# Supplementary material for: The size-responsive phase transition mechanism and upconversion/downshifting luminescence properties of KLu2F7:Yb3+/Er3+nanocrystals
Source: Royal Society of Chemistry journal article supplement (doi:10.1039/c7tc01586k), 2017-01-01
Supplement: c7tc01586k1.pdf [file c7tc01586k1.pdf]

## Supporting Information

# Size-Responsive Phase Transition Mechanism and Upconversion/Downshifting Luminescence Property of $\text{KLu}_2\text{F}_7:\text{Yb}^{3+}/\text{Er}^{3+}$ Nanocrystals

*Xia Xu,<sup>a,b</sup> Xuesong Zhai,<sup>c</sup> Kaimin Du,<sup>a,d</sup> Pengpeng Lei,<sup>a,b</sup> Lile Dong,<sup>a,d</sup> Ruiping Deng,<sup>a</sup>  
Jing Feng,<sup>\*a</sup> and Hongjie Zhang<sup>\*a</sup>*

<sup>a</sup> State Key Laboratory of Rare Earth Resource Utilization, Changchun Institute of Applied Chemistry, Chinese Academy of Science, 5625 Renmin Street, Changchun 130022, China. E-mail: [fengj@ciac.ac.cn](mailto:fengj@ciac.ac.cn); [hongjie@ciac.ac.cn](mailto:hongjie@ciac.ac.cn); Fax: +86-431-85698041; Tel: +86-431-85262127

<sup>b</sup> University of Chinese Academy of Sciences, Beijing 100049, China

<sup>c</sup> School of Materials Engineering, Yancheng Institute of Technology, Yancheng 224051, China

<sup>d</sup> University of Science and Technology of China, Hefei 230026, China

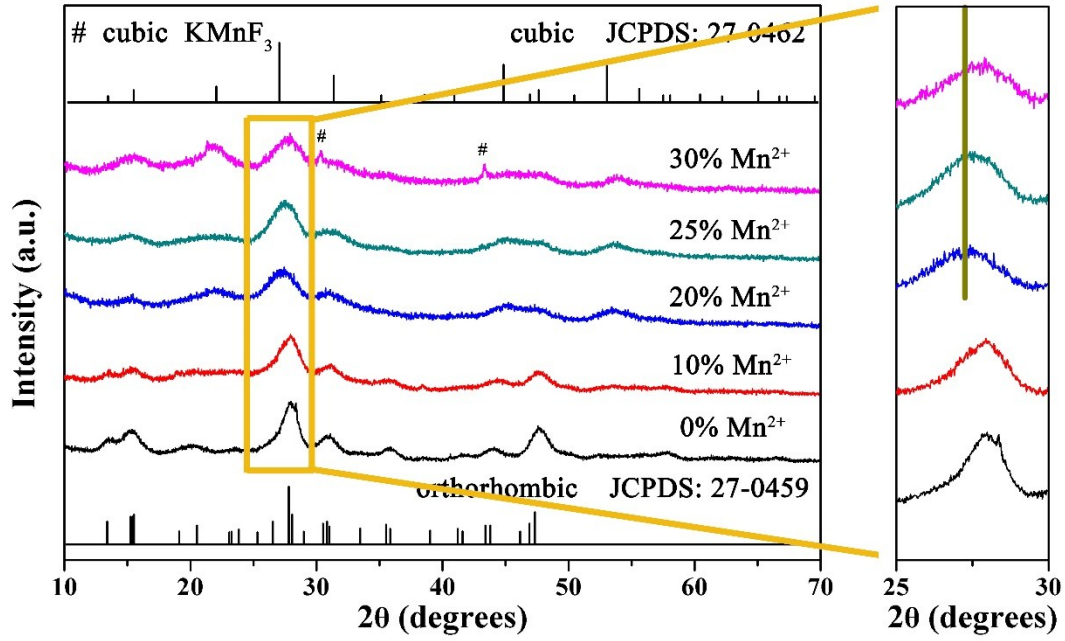

**Fig. S1** XRD patterns of KLu<sub>2</sub>F<sub>7</sub>:Yb<sup>3+</sup>/Er<sup>3+</sup> nanoparticles in the presence of 0, 10, 20, 25 and 30% Mn<sup>2+</sup> dopant ions, respectively (obtained at 260 °C). The enlarged area showed that the diffraction peak shifts slightly to the higher-angle side as a result of the crystal unit cell contractive due to the substitution of Lu<sup>3+</sup> ions by smaller Mn<sup>2+</sup> ions in the host lattice.

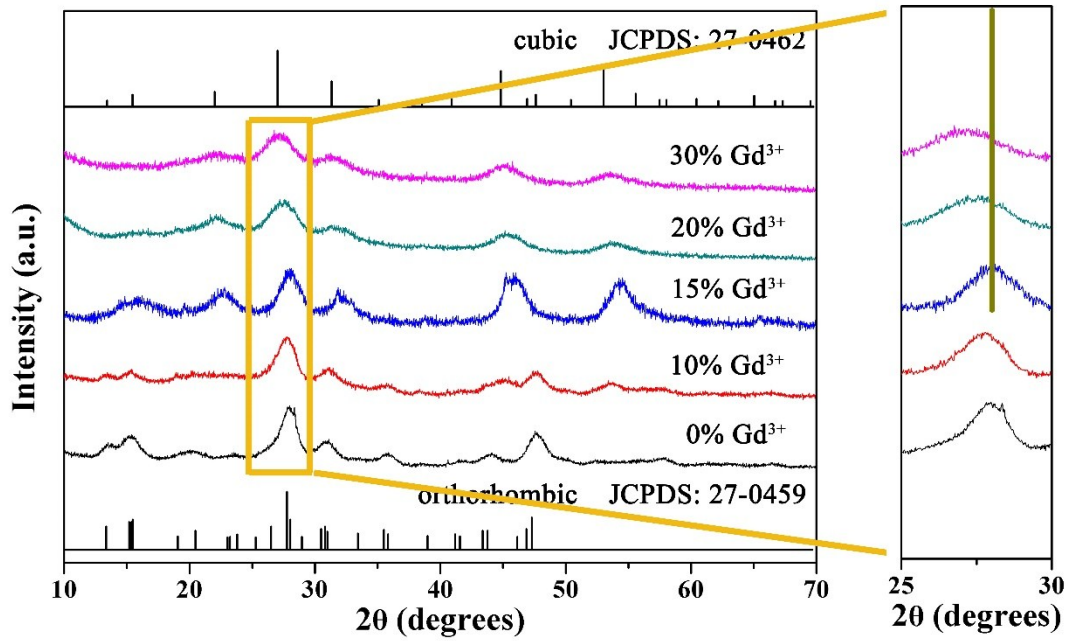

**Fig. S2** XRD patterns of KLu<sub>2</sub>F<sub>7</sub>:Yb<sup>3+</sup>/Er<sup>3+</sup> nanoparticles in the presence of 0, 10, 15, 20 and 30% Gd<sup>3+</sup> dopant ions, respectively (obtained at 260 °C). The enlarged area showed that the diffraction peak shifts slightly to the lower-angle side as a result of the crystal unit cell expanded due to the substitution of Lu<sup>3+</sup> ions by larger Gd<sup>3+</sup> ions in the host lattice.

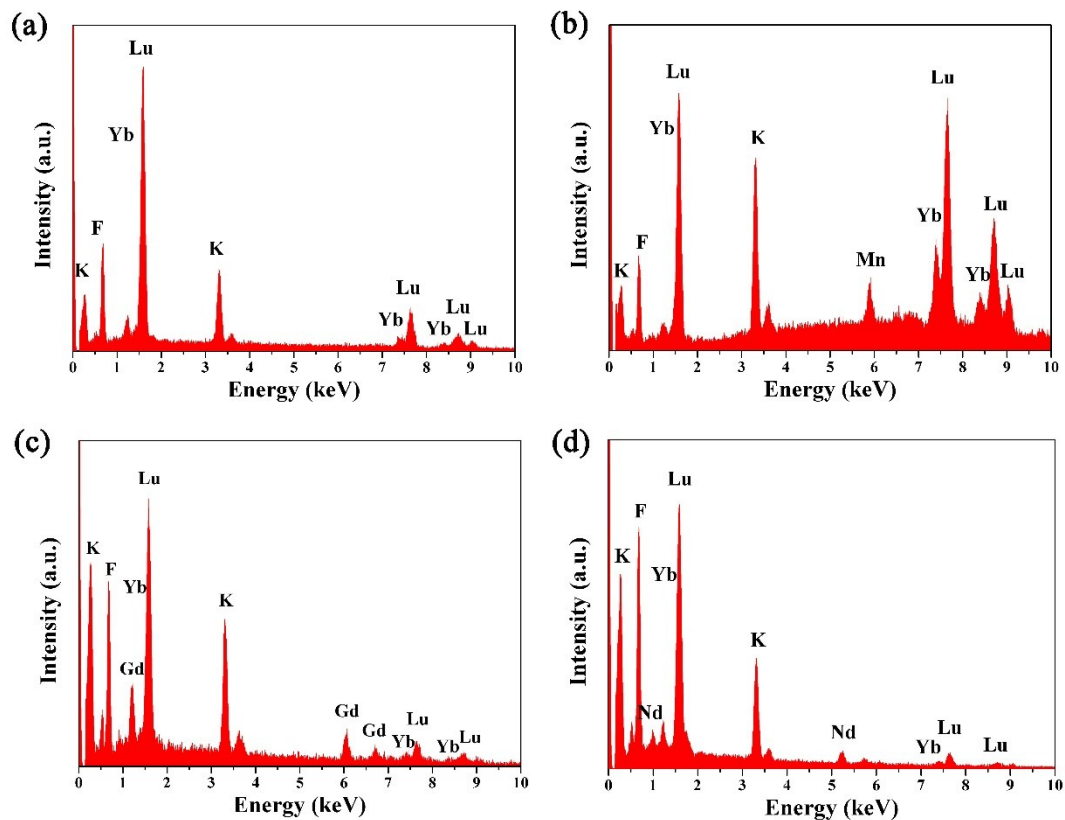

**Fig. S3** EDS of the  $\text{KLu}_2\text{F}_7:\text{Yb}^{3+}/\text{Er}^{3+}$  nanoparticles (a) un-doped and doped with 20% (b)  $\text{Mn}^{2+}$ , (c)  $\text{Gd}^{3+}$  and (d)  $\text{Nd}^{3+}$  ions, respectively (obtained at 260 °C).

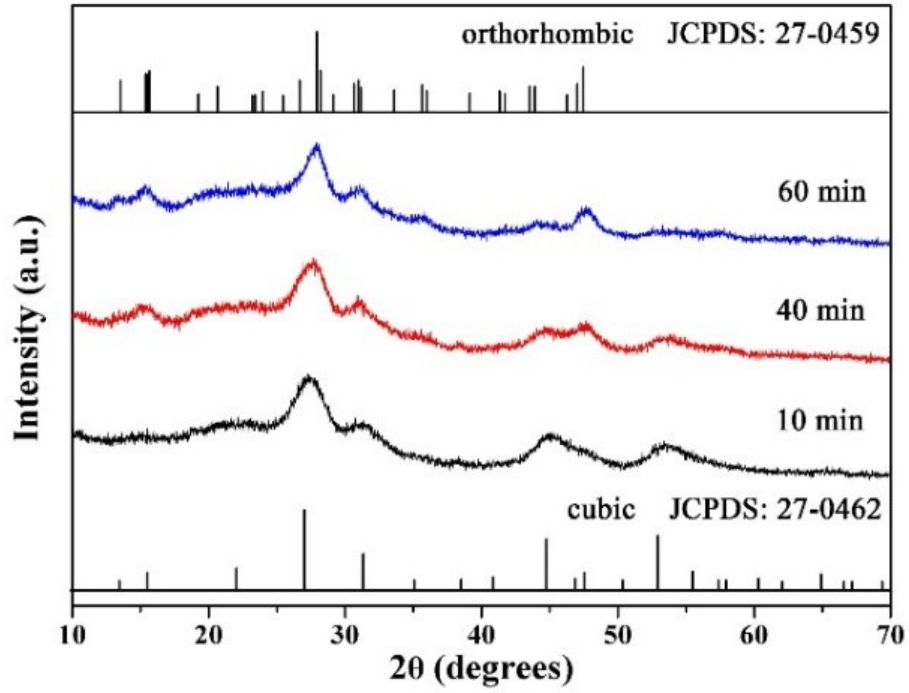

**Fig. S4** XRD patterns of  $\text{KLu}_2\text{F}_7:\text{Yb}^{3+}/\text{Er}^{3+}$  nanoparticles obtained at different reaction times (10 min, 40 min and 60 min) (obtained at 260 °C).

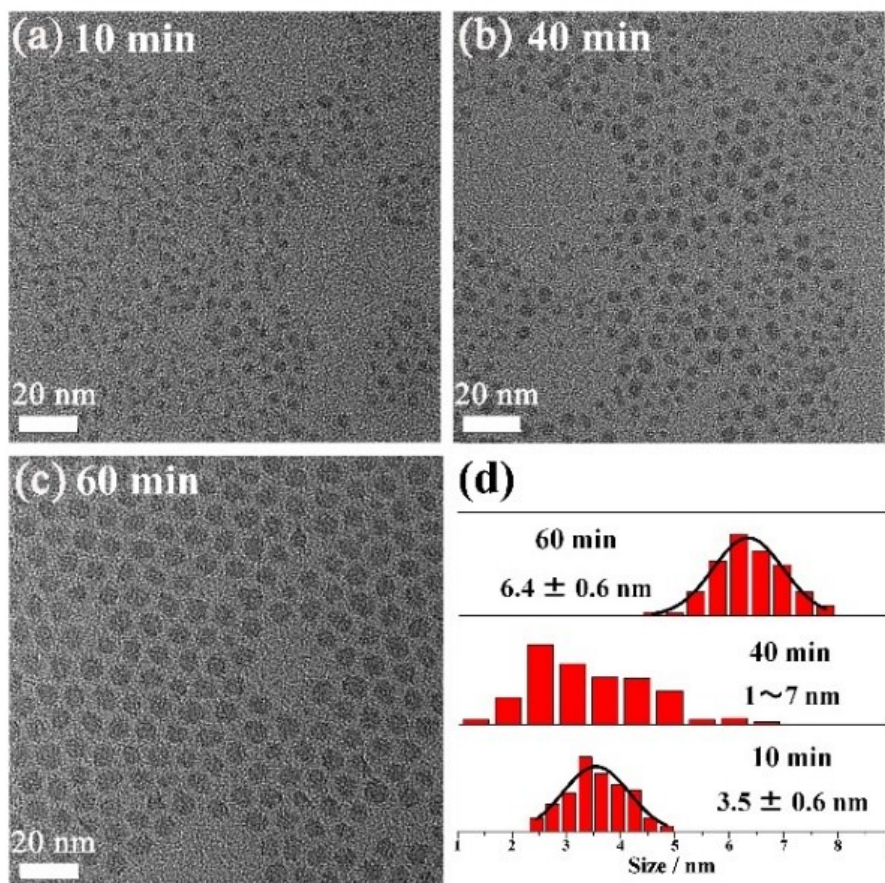

**Fig. S5** TEM images of  $\text{KLu}_2\text{F}_7:\text{Yb}^{3+}/\text{Er}^{3+}$  nanoparticles obtained at different reaction times (a) 10 min, (b) 40 min, (c) 60 min and (d) size distribution of  $\text{KLu}_2\text{F}_7:\text{Yb}^{3+}/\text{Er}^{3+}$  nanoparticles obtained at different reaction times (obtained at 260 °C).

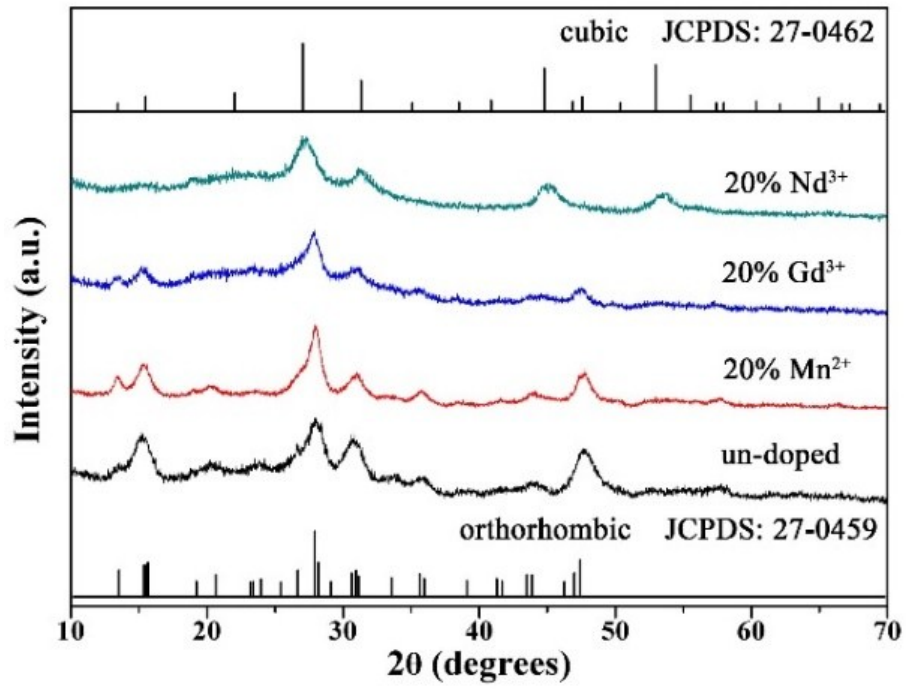

**Fig. S6** XRD patterns of KLu<sub>2</sub>F<sub>7</sub>:Yb<sup>3+</sup>/Er<sup>3+</sup> nanoparticles un-doped and doped with 20% Mn<sup>2+</sup>, Gd<sup>3+</sup> and Nd<sup>3+</sup> ions, respectively (obtained at 290 °C).

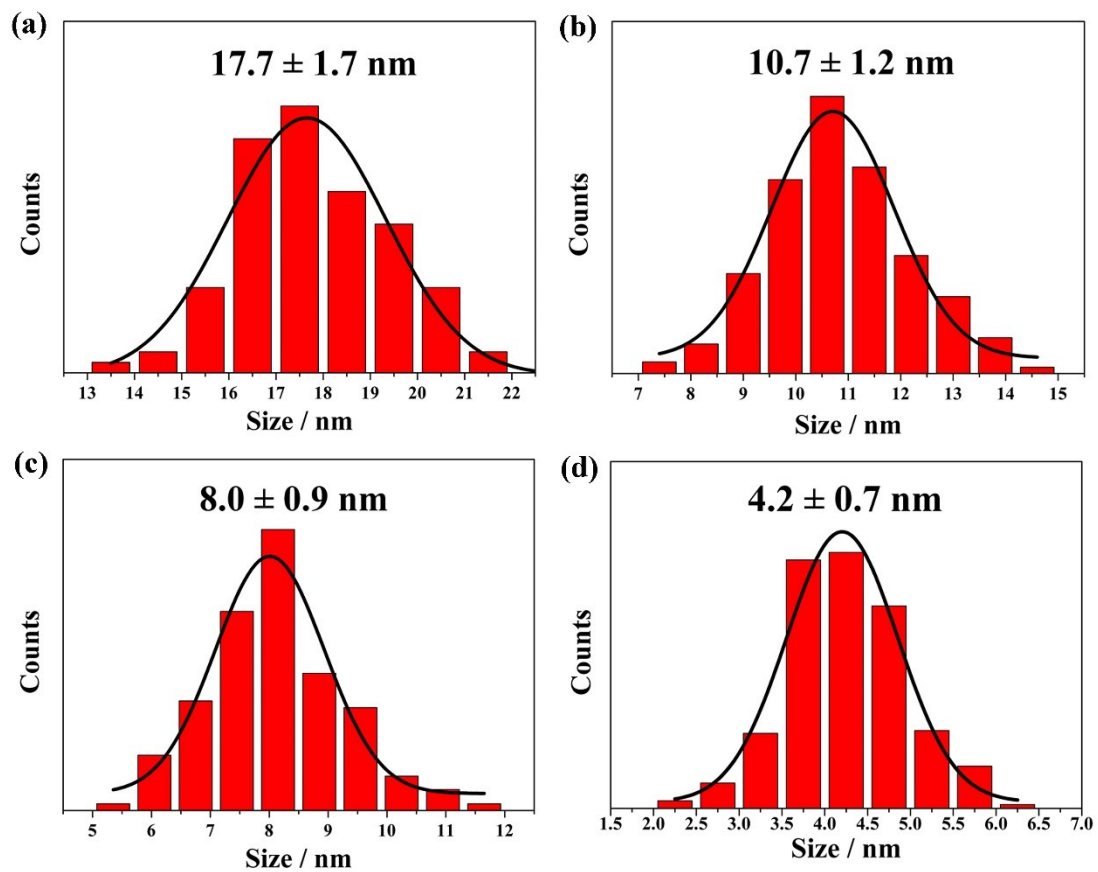

**Fig. S7** Size distribution of  $\text{KLu}_2\text{F}_7:\text{Yb}^{3+}/\text{Er}^{3+}$  nanoparticles (a) un-doped and doped with 20% (b)  $\text{Mn}^{2+}$ , (c)  $\text{Gd}^{3+}$  and (d)  $\text{Nd}^{3+}$  ions, respectively (obtained at 290 °C).



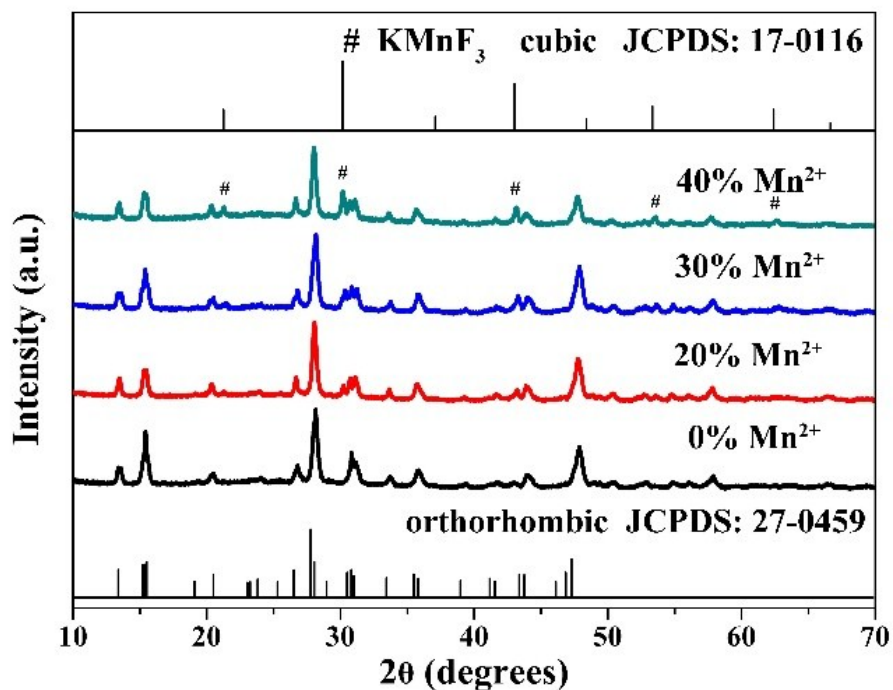

**Fig. S8** XRD patterns of  $\text{KLu}_2\text{F}_7:\text{Yb}^{3+}/\text{Er}^{3+}$  nanoplates in the presence of 0, 20, 30 and 40%  $\text{Mn}^{2+}$  dopant ions, respectively (obtained at 200 °C).

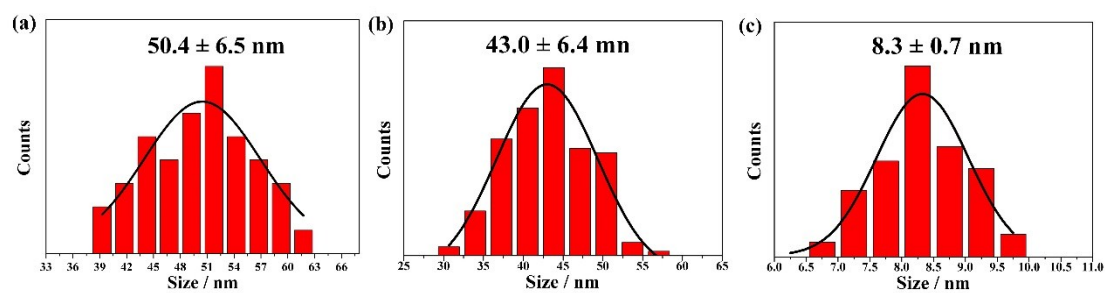

**Fig. S9** The size distribution of  $\text{KLu}_2\text{F}_7:\text{Yb}^{3+}/\text{Er}^{3+}$  nanoparticles (a) un-doped doped with 40% (b)  $\text{Mn}^{2+}$  and (c)  $\text{Gd}^{3+}$  ions, respectively (obtained at 200 °C).

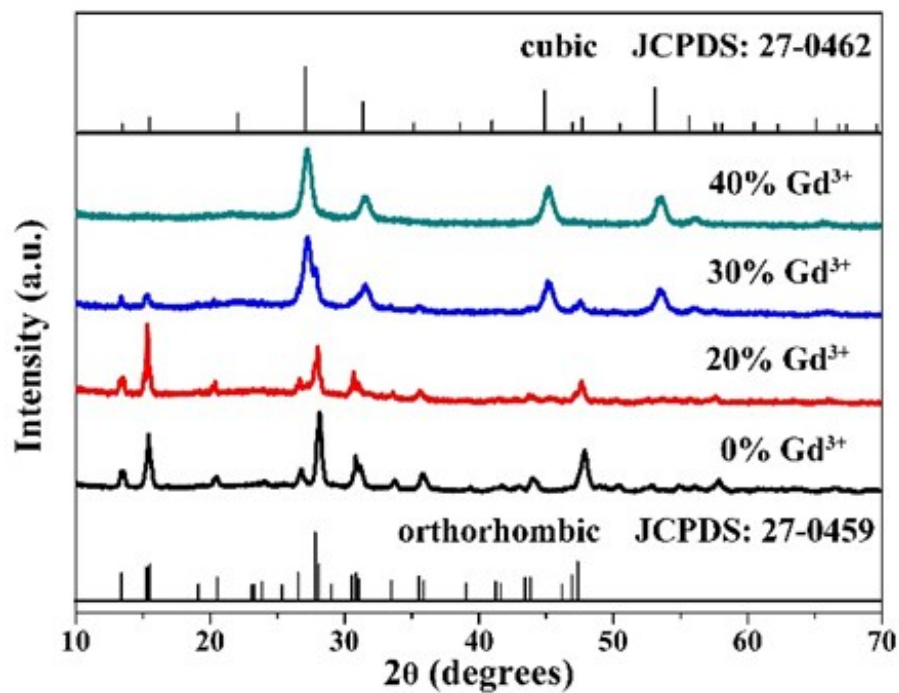

**Fig. S10** XRD patterns of KLu<sub>2</sub>F<sub>7</sub>:Yb<sup>3+</sup>/Er<sup>3+</sup> nanoplates in the presence of 0, 20, 30 and 40% Gd<sup>3+</sup> dopant ions, respectively (obtained at 200 °C).

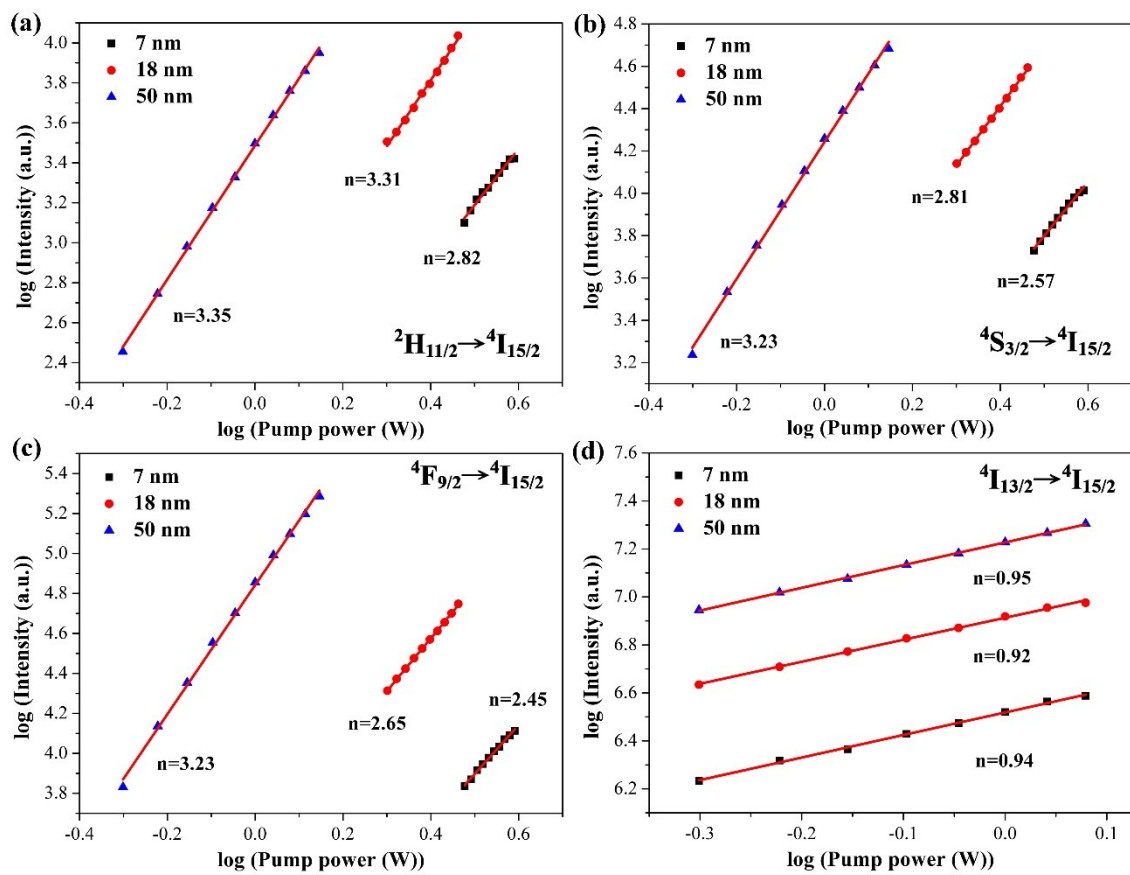

**Fig. S11** The double-logarithmic plots of the emission intensity of different transitions of various sized  $\text{KLu}_2\text{F}_7:\text{Yb}^{3+}/\text{Er}^{3+}$  UCNPs as a function of excitation power, respectively

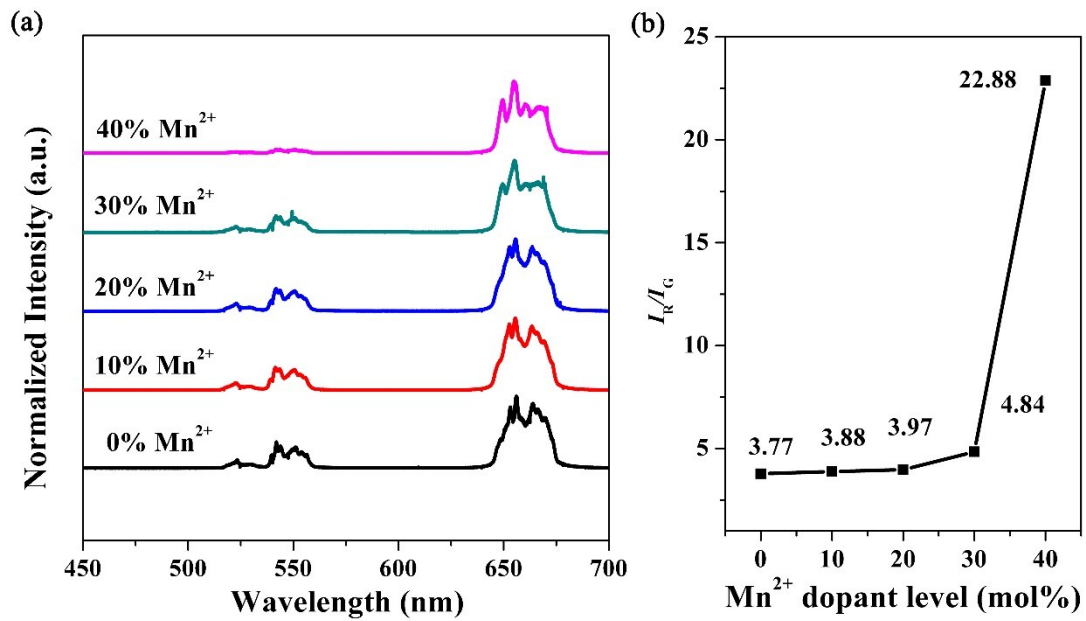

**Fig. S12** (a) Normalized upconversion emission spectra of KLu<sub>2</sub>F<sub>7</sub>:Yb<sup>3+</sup>/Er<sup>3+</sup> nanoparticles with different Mn<sup>2+</sup> ions dopant concentrations. (b) Red to green emission intensity ratio ( $I_R/I_G$ ) versus dopant concentration of Mn<sup>2+</sup> ions.
